# Supplementary material
Source: PubMed Central journal article supplement (PMC3816337)
Supplement: supp_kws457_kws457_Web_Material.pdf [file supp_kws457_kws457_Web_Material.pdf]

## Web Appendix

### Example of Coding for Proportional Hazards Model in Equations 4 - 9.

\*Let case = 1 if breast cancer, = 0 else.

w1 = 1 if ER+, = 0 if ER-

w2 = 1 if PR+, = 0 if PR-

x1 = age

x2 = parity

yrs = follow-up time in years

\*

If w1 = 1 and w2 = 1 then type1=1; else type1 = 0;

If w1 = 1 and w2 = 0 then type2=1; else type2 = 0;

If w1 = 0 and w2 = 0 and case = 1 then type3=1; else type3 = 0;

array main age parity;

array er age\_er parity\_er;

array pr age\_pr parity\_pr;

```
status = type1;
```

```
type = 1;
```

```
do over main;
```

```
    er = main;
```

```
    pr = main;
```

```
end;
```

```
    output;
```

```
status = type2;
```

```
type = 2;
```

```
do over main;
```

```
    er = main;
```

```
    pr = 0;
```

```
end;
```

```
    output;
```

```
status = type3;
```

```
type = 3;

do over main;

    er = 0;

    pr = 0;

end;

    output;

* main effects model;

proc phreg;

model yrs*status(0) = age parity age_er parity_er age_pr
parity_pr;

strata type;

test1: test age + age_er + age_pr = 0/print;

test2: test age + age_er = 0/print;

test3: test age = 0/print;
```

\* test1, test2, test3, test the hypothesis that age has an effect on ER+/PR+, ER+/PR-, and ER-/PR- breast cancer respectively;

test4: test age + age\_er + 0.65 \* age\_pr = 0/print;

test5: test age + 0.65 \* age\_pr = 0/print;

test6: test age + age\_pr + 0.81 \* age\_er = 0/print;

test7: test age + 0.81 \* age\_er = 0/print;

\* test4, test5 estimate the effects of age for ER+ and ER- tumors, respectively, adjusting for PR status, assuming that 65% of tumors overall are PR+ (equation 7);

\* test6, test7 estimate the effects of age for PR+ and PR- tumors, respectively, adjusting for ER status, assuming that 81% of tumors overall are ER+ (equation 7);

\* heterogeneity of the effects estimated by test4 and test5 are assessed by testing the hypothesis  $H_0: \beta_{age\_er} = 0$  vs.  $H_1: \beta_{age\_er} \neq 0$ ;

\* heterogeneity of the effects estimated by test6 and test7 are assessed by testing the hypothesis  $H_0: \beta_{age\_pr} = 0$  vs.  $H_1: \beta_{age\_pr} \neq 0$ ;

**Web Table 1.** Relationship Between Breast Cancer Risk Factor and Breast Cancer According to ER/PR Subtype, Nurses' Health Study 1980 – 2006, Boston, MA, USA.

| Variable                                          | ER+/PR+ |        |         | ER+/PR- |        |         | ER-/PR- |        |         |
|---------------------------------------------------|---------|--------|---------|---------|--------|---------|---------|--------|---------|
|                                                   | $\beta$ | SE     | P value | $\beta$ | SE     | P value | $\beta$ | SE     | P value |
| Duration of Premenopause                          | 0.091   | 0.007  | < 0.001 | 0.097   | 0.015  | < 0.001 | 0.043   | 0.013  | < 0.001 |
| Duration of Menopause                             |         |        |         |         |        |         |         |        |         |
| Natural                                           | 0.036   | 0.004  | < 0.001 | 0.042   | 0.008  | < 0.001 | 0.022   | 0.008  | 0.005   |
| Bilateral oophorectomy                            | 0.030   | 0.006  | < 0.001 | 0.034   | 0.011  | 0.003   | 0.027   | 0.010  | 0.007   |
| Pregnancy History                                 |         |        |         |         |        |         |         |        |         |
| Gynecologic age at first birth (yrs) <sup>a</sup> | -0.003  | 0.004  | 0.48    | 0.021   | 0.009  | 0.020   | 0.018   | 0.009  | 0.051   |
| Birth Index                                       | -0.0036 | 0.0007 | < 0.001 | -0.0032 | 0.0014 | 0.017   | 0.0002  | 0.0013 | 0.88    |
| Benign breast disease (BBD)                       |         |        |         |         |        |         |         |        |         |
| BBD (yes vs. no)                                  | 0.663   | 0.499  | 0.18    | 0.753   | 0.999  | 0.45    | 0.178   | 0.873  | 0.84    |
| BBD x age at menarche                             | 0.042   | 0.023  | 0.068   | 0.048   | 0.045  | 0.28    | 0.020   | 0.043  | 0.65    |
| BBD x duration premenopause                       | -0.015  | 0.009  | 0.11    | -0.020  | 0.019  | 0.29    | 0.000   | 0.016  | 1.00    |

|                                                 |         |        |         |         |        |         |         |        |       |
|-------------------------------------------------|---------|--------|---------|---------|--------|---------|---------|--------|-------|
| BBD x duration<br>postmenopause                 | -0.023  | 0.005  | < 0.001 | -0.014  | 0.010  | 0.15    | -0.002  | 0.009  | 0.79  |
| Hormone Therapy<br>use (HT)                     |         |        |         |         |        |         |         |        |       |
| Duration, oral<br>estrogen alone                | 0.023   | 0.007  | 0.002   | 0.014   | 0.014  | 0.31    | 0.004   | 0.014  | 0.76  |
| Duration, oral<br>estrogen plus<br>progesterone | 0.062   | 0.008  | < 0.001 | 0.019   | 0.018  | 0.29    | 0.028   | 0.018  | 0.12  |
| Duration, other<br>types of<br>hormones         | 0.025   | 0.009  | 0.003   | -0.007  | 0.018  | 0.72    | 0.013   | 0.017  | 0.46  |
| Current Use                                     | 0.294   | 0.066  | < 0.001 | 0.319   | 0.132  | 0.016   | 0.114   | 0.125  | 0.36  |
| Past Use                                        | -0.183  | 0.067  | 0.007   | 0.026   | 0.127  | 0.84    | -0.234  | 0.124  | 0.060 |
| Body mass index<br>(BMI), kg/m <sup>2</sup>     |         |        |         |         |        |         |         |        |       |
| Estrogen<br>Positive <sup>b</sup>               | -0.0006 | 0.0002 | 0.006   | -0.0017 | 0.0005 | < 0.001 | -0.0008 | 0.0004 | 0.042 |
| Estrogen<br>Negative <sup>c</sup>               | 0.0036  | 0.0005 | < 0.001 | 0.0015  | 0.0010 | 0.16    | 0.0003  | 0.0010 | 0.79  |
| Height (in)                                     |         |        |         |         |        |         |         |        |       |
| Estrogen<br>Positive <sup>b</sup>               | 0.0011  | 0.0003 | < 0.001 | 0.0001  | 0.0006 | 0.87    | -0.0002 | 0.0005 | 0.70  |
| Estrogen<br>Negative <sup>c</sup>               | -0.0001 | 0.0011 | 0.90    | -0.0009 | 0.0021 | 0.66    | 0.0036  | 0.0020 | 0.072 |

|                                                                            |          |         |         |          |         |         |          |         |         |
|----------------------------------------------------------------------------|----------|---------|---------|----------|---------|---------|----------|---------|---------|
| Alcohol consumption<br>(gm) <sup>d</sup>                                   |          |         |         |          |         |         |          |         |         |
| Premenopause                                                               | 0.00047  | 0.00012 | < 0.001 | 0.00056  | 0.00023 | 0.014   | 0.00044  | 0.00023 | 0.064   |
| Postmenopause<br>on pmh                                                    | -0.00011 | 0.00031 | 0.71    | -0.00012 | 0.00063 | 0.85    | -0.00171 | 0.00084 | 0.042   |
| Postmenopause<br>not on pmh                                                | 0.00037  | 0.00023 | 0.11    | 0.00015  | 0.00044 | 0.74    | -0.00008 | 0.00047 | 0.86    |
| Family history of<br>breast cancer in a 1 <sup>st</sup><br>degree relative | 0.412    | 0.057   | < 0.001 | 0.506    | 0.109   | < 0.001 | 0.387    | 0.107   | < 0.001 |

---

BBD, benign breast disease; BMI, body mass index; ER, estrogen receptor; HT, hormone therapy; PR, progesterone receptor.

<sup>a</sup> age at 1st birth – age at menarche

<sup>b</sup> BMI\_estrogen positive =  $BMI_1/100$ ; height\_estrogen positive =  $h_1/100$ . Estrogen positive person time includes premenopausal person-time and postmenopausal person-time while on HT

<sup>c</sup> BMI\_estrogen negative =  $BMI_2/100$ ; height\_estrogen negative =  $h_2/100$ . Estrogen negative person time includes postmenopausal person-time while not on HT.

<sup>d</sup> Alcohol\_premenopause =  $alc_1/100$ ; alcohol\_postmenopause on pmh =  $alc_2/100$ ; alcohol\_postmenopause not on pmh =  $alc_3/100$ .

**Web Table 2.** Effects of Breast Cancer Risk Factors by ER, PR and HER2 Subtype, Adjusted for Other Tumor Markers, Cox Proportional Hazards Model, Nurses' Health Study 1980 – 2006, Case Subtypes Assessed by TMA, n = 1,331 Cases, Boston, MA, USA.

| Variable                                          | Increment <sup>a</sup> | Subtype | ER   |            |                    | PR   |            |                     | HER2 |            |                   |
|---------------------------------------------------|------------------------|---------|------|------------|--------------------|------|------------|---------------------|------|------------|-------------------|
|                                                   |                        |         | HR   | 95% CI     | P-value            | HR   | 95% CI     | P-value             | HR   | 95% CI     | P-value           |
| Duration of Premenopause (yrs)                    | 1                      | +       | 1.09 | 1.07, 1.11 | < 0.001            | 1.08 | 1.06, 1.11 | < 0.001             | 1.06 | 1.01, 1.11 | 0.017             |
|                                                   |                        | -       | 1.05 | 1.01, 1.10 | 0.028              | 1.07 | 1.04, 1.11 | < 0.001             | 1.08 | 1.06, 1.10 | <0.001            |
| Duration post Menopause (yrs)                     |                        |         |      |            | 0.22 <sup>b</sup>  |      |            | 0.76 <sup>b</sup>   |      |            | 0.42 <sup>b</sup> |
| Natural                                           | 1                      | +       | 0.99 | 0.98, 1.01 | 0.23               | 0.98 | 0.96, 1.00 | 0.018               | 1.00 | 0.97, 1.03 | 0.88              |
|                                                   |                        | -       | 0.96 | 0.93, 0.99 | 0.008              | 0.99 | 0.97, 1.01 | 0.44                | 0.98 | 0.96, 0.99 | <0.001            |
|                                                   |                        |         |      |            | 0.065 <sup>b</sup> |      |            | 0.49 <sup>b</sup>   |      |            | 0.11 <sup>b</sup> |
| Bilateral oophorectomy                            | 1                      | +       | 1.00 | 0.98, 1.02 | 0.98               | 0.96 | 0.94, 0.98 | 0.001               | 0.98 | 0.94, 1.03 | 0.47              |
|                                                   |                        | -       | 0.93 | 0.89, 0.97 | <0.001             | 1.03 | 1.00, 1.06 | 0.031               | 0.98 | 0.96, 1.00 | 0.029             |
|                                                   |                        |         |      |            | 0.87 <sup>b</sup>  |      |            | <0.001 <sup>b</sup> |      |            | 0.84 <sup>b</sup> |
| Pregnancy History                                 |                        |         |      |            |                    |      |            |                     |      |            |                   |
| Gynecologic age at first birth (yrs) <sup>c</sup> | 22                     | +       | 1.57 | 1.14, 2.18 | 0.006              | 1.40 | 0.97, 2.01 | 0.073               | 0.93 | 0.46, 1.88 | 0.84              |
|                                                   |                        | -       | 1.50 | 0.72, 3.18 | 0.28               | 1.42 | 1.09, 3.36 | 0.031               | 1.70 | 1.26, 2.29 | 0.029             |
|                                                   |                        |         |      |            | 0.92 <sup>b</sup>  |      |            | 0.41 <sup>b</sup>   |      |            | 0.13 <sup>b</sup> |
| Birth Index                                       | 102                    | +       | 0.70 | 0.56, 0.90 | 0.002              | 0.75 | 0.59, 0.97 | 0.026               | 0.86 | 0.55, 1.34 | 0.51              |
|                                                   |                        | -       | 0.94 | 0.57, 1.50 | 0.95               | 0.74 | 0.50, 1.10 | 0.13                | 0.72 | 0.59, 0.89 | 0.002             |
|                                                   |                        |         |      |            | 0.35 <sup>b</sup>  |      |            | 0.94 <sup>b</sup>   |      |            | 0.50 <sup>b</sup> |
| Benign breast disease (BBD) (present vs. absent)  |                        |         |      |            |                    |      |            |                     |      |            |                   |



|                                    |    |   |      |            |                    |      |            |                     |      |            |                    |
|------------------------------------|----|---|------|------------|--------------------|------|------------|---------------------|------|------------|--------------------|
| Age 50                             | 1  | + | 1.57 | 1.29, 1.91 | <0.001             | 1.61 | 1.30, 2.01 | <0.001              | 2.27 | 1.50, 3.44 | <0.001             |
|                                    |    | - | 1.21 | 0.79, 1.86 | 0.38               | 1.26 | 0.90, 1.78 | 0.18                | 1.37 | 1.15, 1.63 | <0.001             |
|                                    |    |   |      |            | 0.32 <sup>b</sup>  |      |            | 0.30 <sup>b</sup>   |      |            | 0.028 <sup>b</sup> |
| Age 70                             | 1  | + | 1.01 | 0.79, 1.28 | 0.95               | 1.00 | 0.75, 1.32 | 0.98                | 0.91 | 0.54, 1.56 | 0.74               |
|                                    |    | - | 1.30 | 0.75, 2.25 | 0.5                | 1.21 | 0.82, 1.79 | 0.33                | 1.05 | 0.83, 1.34 | 0.66               |
|                                    |    |   |      |            | 0.43 <sup>b</sup>  |      |            | 0.46 <sup>b</sup>   |      |            | 0.63 <sup>b</sup>  |
| Hormone Therapy use (HT)           |    |   |      |            |                    |      |            |                     |      |            |                    |
| oral estrogen (yrs)                |    |   |      |            |                    |      |            |                     |      |            |                    |
| Current user                       | 10 | + | 1.34 | 1.02, 1.76 | 0.035              | 2.29 | 1.68, 3.13 | <0.001              | 1.13 | 0.60, 2.11 | 0.71               |
|                                    |    | - | 2.80 | 1.55, 5.03 | <0.001             | 0.76 | 0.48, 2.20 | 0.24                | 1.56 | 1.20, 2.01 | <0.001             |
|                                    |    |   |      |            | 0.038 <sup>b</sup> |      |            | <0.001 <sup>b</sup> |      |            | 0.35 <sup>b</sup>  |
| Past user                          | 10 | + | 0.99 | 0.71, 1.37 | 0.95               | 1.40 | 0.95, 2.05 | 0.090               | 1.00 | 0.48, 2.10 | 0.49               |
|                                    |    | - | 1.48 | 0.71, 3.10 | 0.30               | 0.66 | 0.38, 1.14 | 0.13                | 1.09 | 0.80, 1.50 | 0.58               |
|                                    |    |   |      |            | 0.36 <sup>b</sup>  |      |            | 0.046 <sup>b</sup>  |      |            | 0.83 <sup>b</sup>  |
| oral estrogen & progesterone (yrs) |    |   |      |            |                    |      |            |                     |      |            |                    |
| Current user                       | 10 | + | 0.76 | 0.51, 1.15 | 0.20               | 1.13 | 0.75, 1.71 | 0.56                | 1.16 | 0.58, 2.34 | 0.67               |
|                                    |    | - | 0.74 | 0.27, 2.01 | 0.56               | 0.35 | 0.16, 0.76 | 0.008               | 0.61 | 0.41, 0.91 | 0.016              |
|                                    |    |   |      |            | 0.96 <sup>b</sup>  |      |            | 0.020 <sup>b</sup>  |      |            | 0.12 <sup>b</sup>  |
| Past user                          | 10 | + | 0.56 | 0.35, 0.90 | 0.016              | 0.69 | 0.43, 1.11 | 0.12                | 1.04 | 0.46, 2.33 | 0.93               |
|                                    |    | - | 0.39 | 0.13, 1.21 | 0.10               | 0.30 | 0.13, 0.71 | 0.006               | 0.43 | 0.27, 0.68 | <0.001             |
|                                    |    |   |      |            | 0.59 <sup>b</sup>  |      |            | 0.14 <sup>b</sup>   |      |            | 0.064 <sup>b</sup> |
| Other types of hormones (yrs)      |    |   |      |            |                    |      |            |                     |      |            |                    |
| Current user                       | 10 | + | 0.90 | 0.64, 1.28 | 0.56               | 1.13 | 0.75, 1.71 | 0.56                | 0.68 | 0.30, 1.55 | 0.36               |

|                                            |    |   |      |            |                             |      |            |                             |      |            |                             |
|--------------------------------------------|----|---|------|------------|-----------------------------|------|------------|-----------------------------|------|------------|-----------------------------|
|                                            |    | - | 1.24 | 0.57, 2.68 | 0.59<br>0.49 <sup>b</sup>   | 0.71 | 0.41, 1.25 | 0.24<br>0.24 <sup>b</sup>   | 0.99 | 0.71, 1.39 | 0.97<br>0.40 <sup>b</sup>   |
| Past user                                  | 10 | + | 0.67 | 0.45, 0.99 | 0.043                       | 0.69 | 0.43, 1.11 | 0.12                        | 0.60 | 0.24, 1.51 | 0.28                        |
|                                            |    | - | 0.66 | 0.27, 1.60 | 0.36<br>0.97 <sup>b</sup>   | 0.62 | 0.33, 1.17 | 0.14<br>0.81 <sup>b</sup>   | 0.70 | 0.48, 1.02 | 0.066<br>0.77 <sup>b</sup>  |
| Body mass index (BMI) (kg/m <sup>2</sup> ) |    |   |      |            |                             |      |            |                             |      |            |                             |
| Age 50                                     | 8  | + | 0.64 | 0.52, 0.79 | <0.001                      | 0.71 | 0.56, 0.89 | 0.004                       | 0.71 | 0.45, 1.11 | 0.13                        |
|                                            |    | - | 0.74 | 0.46, 1.19 | 0.22<br>0.63 <sup>b</sup>   | 0.58 | 0.39, 0.86 | 0.006<br>0.45 <sup>b</sup>  | 0.67 | 0.55, 0.81 | <0.001<br>0.84 <sup>b</sup> |
| Age 70                                     | 8  | + | 0.86 | 0.66, 1.13 | 0.29                        | 1.16 | 0.84, 1.59 | 0.37                        | 1.22 | 0.71, 2.09 | 0.46                        |
|                                            |    | - | 0.80 | 0.39, 1.63 | 0.54<br>0.86 <sup>b</sup>   | 0.46 | 0.28, 0.76 | 0.002<br>0.006 <sup>b</sup> | 0.84 | 0.64, 1.10 | 0.19<br>0.22 <sup>b</sup>   |
| Height (in.)                               |    |   |      |            |                             |      |            |                             |      |            |                             |
| Age 50                                     | 6  | + | 1.19 | 0.97, 1.44 | 0.090                       | 1.24 | 1.00, 1.54 | 0.052                       | 0.80 | 0.52, 1.22 | 0.31                        |
|                                            |    | - | 1.13 | 0.74, 1.75 | 0.57<br>0.87 <sup>b</sup>   | 1.05 | 0.74, 1.49 | 0.76<br>0.50 <sup>b</sup>   | 1.19 | 0.97, 1.44 | 0.090<br>0.055 <sup>b</sup> |
| Age 70                                     | 6  | + | 1.10 | 0.76, 1.60 | 0.60                        | 1.68 | 1.07, 2.64 | 0.024                       | 1.30 | 0.58, 2.89 | 0.52                        |
|                                            |    | - | 2.58 | 1.10, 6.08 | 0.030<br>0.089 <sup>b</sup> | 0.85 | 0.47, 1.55 | 0.59<br>0.10 <sup>b</sup>   | 1.10 | 0.76, 1.60 | 0.60<br>0.97 <sup>b</sup>   |
| Alcohol (gm)                               |    |   |      |            |                             |      |            |                             |      |            |                             |
| Age 50                                     | 11 | + | 1.09 | 0.97, 1.23 | 0.16                        | 0.97 | 0.84, 1.14 | 0.74                        | 1.21 | 0.97, 1.51 | 0.088                       |
|                                            |    | - | 0.82 | 0.60, 1.10 | 0.19<br>0.088 <sup>b</sup>  | 1.12 | 0.92, 1.36 | 0.25<br>0.30 <sup>b</sup>   | 0.97 | 0.85, 1.11 | 0.68<br>0.094 <sup>b</sup>  |
| Age 70                                     | 11 | + | 1.20 | 1.02, 1.41 | 0.031                       | 1.10 | 0.90, 1.35 | 0.36                        | 1.34 | 0.97, 1.84 | 0.078                       |
|                                            |    | - | 0.88 | 0.58, 1.34 | 0.54                        | 1.15 | 0.88, 1.49 | 0.30                        | 1.05 | 0.88, 1.26 | 0.56                        |

|                                 |   |   |      |            |                   |      |            |                   |      |                   |                   |
|---------------------------------|---|---|------|------------|-------------------|------|------------|-------------------|------|-------------------|-------------------|
|                                 |   |   |      |            | 0.19 <sup>b</sup> |      |            | 0.81 <sup>b</sup> |      | 0.21 <sup>b</sup> |                   |
| Family history of breast cancer | 1 | + | 1.43 | 1.19, 1.72 | <0.001            | 1.35 | 1.09, 1.68 | 0.005             | 1.20 | 0.78, 1.83        | 0.41              |
|                                 |   | - | 1.36 | 0.90, 2.07 | 0.15              | 1.55 | 1.13, 2.12 | 0.007             | 1.49 | 1.26, 1.77        | <0.001            |
|                                 |   |   |      |            | 0.84 <sup>b</sup> |      |            | 0.54 <sup>b</sup> |      |                   | 0.35 <sup>b</sup> |

BBD, benign breast disease; BMI, body mass index; CI, confidence interval; ER, estrogen receptor; HER2, Human Epidermal growth factor Receptor 2; HR, hazard ratio; HT, hormone therapy; PR, progesterone receptor; TMA, tumor tissue microarray.

<sup>a</sup> Increment: duration of premenopause, duration of menopause, 1 yr; gynecologic age at 1<sup>st</sup> birth, 22 (35-13) yrs vs. nulliparous; birth index, 102 (4 births at ages 20, 23, 26, 29) vs. nulliparous; benign breast disease, family history, present vs. absent; hormone therapy, 10 yrs of use vs. 0 yrs of use; body mass index, 8 kg/m<sup>2</sup> (30 kg/m<sup>2</sup> vs. 22 kg/m<sup>2</sup>); height 6 in. (5'10" vs. 5'4"); alcohol (11 gm, 1 drink per day vs. 0 drinks per day starting at age 18). All comparisons assume age at menarche = 13 and age at natural menopause = 50; HR for Body mass index, height and alcohol assume no HT use

<sup>b</sup> P value for heterogeneity comparing subtype + vs. subtype -

<sup>c</sup> age at 1<sup>st</sup> birth – age at menarche

**Web Table 3.** Effects of Breast Cancer Risk Factors by ER, PR and HER2 Subtype, Adjusted for Other Tumor Markers and Tumor Size<sup>a</sup>, Cox Proportional Hazards' Model, Nurses' Health Study, 1980-2006, Boston, MA, USA.

| Variable                                          | Increment <sup>b</sup> | subtype | ER   |            |                     | PR   |            |                    | HER2 |            |                    | Tumor size |            |                     |
|---------------------------------------------------|------------------------|---------|------|------------|---------------------|------|------------|--------------------|------|------------|--------------------|------------|------------|---------------------|
|                                                   |                        |         | HR   | 95% CI     | P-value             | HR   | 95% CI     | P-value            | HR   | 95% CI     | P-value            | HR         | 95% CI     | P-value             |
| Duration of Premenopause (yrs)                    | 1                      | +       | 1.10 | 1.08, 1.11 | <0.001              | 1.08 | 1.07, 1.10 | <0.001             | 1.08 | 1.03, 1.14 | <0.001             | 1.09       | 1.07, 1.11 | <0.001              |
|                                                   |                        | -       | 1.04 | 1.01, 1.08 | 0.019               | 1.09 | 1.07, 1.12 | <0.001             | 1.09 | 1.07, 1.11 | <0.001             | 1.09       | 1.07, 1.10 | <0.001              |
| Duration of Menopause (yrs)                       |                        |         |      |            | <0.008 <sup>c</sup> |      |            | 0.56 <sup>c</sup>  |      |            | 0.86 <sup>c</sup>  |            |            | 0.95 <sup>c</sup>   |
| Natural                                           | 1                      | +       | 1.04 | 1.03, 1.05 | <0.001              | 1.03 | 1.02, 1.04 | <0.001             | 1.05 | 1.03, 1.08 | <0.001             | 1.02       | 1.00, 1.03 | 0.014               |
|                                                   |                        | -       | 1.02 | 1.01, 1.08 | 0.019               | 1.04 | 1.03, 1.05 | <0.001             | 1.02 | 1.01, 1.03 | 0.002              | 1.04       | 1.04, 1.05 | <0.001              |
|                                                   |                        |         |      |            | 0.12 <sup>c</sup>   |      |            | 0.50 <sup>c</sup>  |      |            | 0.020 <sup>c</sup> |            |            | <0.001 <sup>c</sup> |
| Bilateral oophorectomy                            | 1                      | +       | 1.03 | 1.02, 1.04 | <0.001              | 1.03 | 1.02, 1.04 | <0.001             | 1.04 | 1.01, 1.08 | 0.014              | 1.02       | 1.00, 1.04 | 0.047               |
|                                                   |                        | -       | 1.03 | 1.00, 1.05 | 0.045               | 1.04 | 1.02, 1.05 | <0.001             | 1.02 | 1.01, 1.04 | 0.003              | 1.05       | 1.02, 1.08 | 0.001               |
|                                                   |                        |         |      |            | 0.72 <sup>c</sup>   |      |            | 0.67 <sup>c</sup>  |      |            | 0.21 <sup>c</sup>  |            |            | 0.067 <sup>c</sup>  |
| Pregnancy History                                 |                        |         |      |            |                     |      |            |                    |      |            |                    |            |            |                     |
| Gynecologic age at first birth (yrs) <sup>d</sup> | 22                     | +       | 1.14 | 0.94, 1.38 | 0.17                | 0.94 | 0.91, 1.18 | 0.58               | 1.22 | 0.64, 2.34 | 0.55               | 1.26       | 0.93, 1.69 | 0.13                |
|                                                   |                        | -       | 1.03 | 0.63, 1.69 | 0.91                | 1.54 | 1.11, 2.15 | 0.010              | 1.39 | 1.05, 1.84 | 0.020              | 1.07       | 0.88, 1.30 | 0.52                |
|                                                   |                        |         |      |            | 0.72 <sup>c</sup>   |      |            | 0.028 <sup>c</sup> |      |            | 0.71 <sup>c</sup>  |            |            | 0.37 <sup>c</sup>   |
| Birth Index                                       | 102                    | +       | 0.71 | 0.62, 0.81 | <0.001              | 0.76 | 0.65, 0.88 | <0.001             | 0.89 | 0.59, 1.34 | 0.58               | 0.67       | 0.54, 0.82 | <0.001              |
|                                                   |                        | -       | 1.02 | 0.74, 1.41 | 0.88                | 0.77 | 0.61, 0.96 | 0.023              | 0.83 | 0.69, 1.00 | 0.051              | 0.80       | 0.71, 0.91 | <0.001              |
|                                                   |                        |         |      |            | 0.055 <sup>c</sup>  |      |            | 0.92 <sup>c</sup>  |      |            | 0.78 <sup>c</sup>  |            |            | 0.14 <sup>c</sup>   |
| Benign breast disease (BBD) (present vs. absent)  |                        |         |      |            |                     |      |            |                    |      |            |                    |            |            |                     |
| Age 50                                            | 1                      | +       | 1.89 | 1.63, 2.17 | <0.001              | 1.84 | 1.56, 2.17 | <0.001             | 2.14 | 1.32, 3.48 | 0.002              | 1.62       | 1.32, 1.98 | <0.001              |
|                                                   |                        | -       | 1.54 | 1.10, 2.16 | 0.011               | 1.77 | 1.39, 2.27 | <0.001             | 1.73 | 1.43, 2.09 | <0.001             | 1.91       | 1.65, 2.20 | <0.001              |
|                                                   |                        |         |      |            | 0.32 <sup>c</sup>   |      |            | 0.83 <sup>c</sup>  |      |            | 0.42 <sup>c</sup>  |            |            | 0.19 <sup>c</sup>   |

|                                    |    |   |      |            |                   |      |            |        |      |            |                   |      |            |        |
|------------------------------------|----|---|------|------------|-------------------|------|------------|--------|------|------------|-------------------|------|------------|--------|
| Age 70                             | 1  | + | 1.32 | 1.17, 1.48 | <0.001            | 1.25 | 1.09, 1.43 | 0.002  | 1.61 | 1.13, 2.29 | 0.009             | 1.48 | 1.22, 1.80 | <0.001 |
|                                    |    | - | 1.30 | 0.97, 1.75 | 0.078             | 1.44 | 1.18, 1.75 | <0.001 | 1.22 | 1.03, 1.44 | 0.021             | 1.25 | 1.11, 1.40 | <0.001 |
|                                    |    |   |      |            | 0.96 <sup>c</sup> |      |            |        |      |            | 0.29 <sup>c</sup> |      |            |        |
| Hormone Therapy use (HT)           |    |   |      |            |                   |      |            |        |      |            |                   |      |            |        |
| oral estrogen (yrs)                |    |   |      |            |                   |      |            |        |      |            |                   |      |            |        |
| Current user                       | 10 | + | 1.64 | 1.41, 1.91 | <0.001            | 1.59 | 1.33, 1.89 | <0.001 | 1.06 | 0.64, 1.76 | 0.81              | 1.17 | 0.92, 1.50 | 0.20   |
|                                    |    | - | 1.28 | 0.89, 1.86 | 0.19              | 1.53 | 1.19, 1.98 | <0.001 | 1.21 | 0.97, 1.50 | 0.092             | 1.77 | 1.53, 2.05 | <0.001 |
|                                    |    |   |      |            | 0.26 <sup>c</sup> |      |            |        |      |            | 0.85 <sup>c</sup> |      |            |        |
| Past user                          | 10 | + | 1.06 | 0.89, 1.27 | 0.51              | 0.95 | 0.77, 1.18 | 0.66   | 0.94 | 0.53, 1.65 | 0.82              | 0.80 | 0.60, 1.08 | 0.14   |
|                                    |    | - | 0.78 | 0.50, 1.22 | 0.27              | 1.09 | 0.81, 1.48 | 0.55   | 1.39 | 1.08, 1.78 | 0.009             | 1.10 | 0.92, 1.31 | 0.30   |
|                                    |    |   |      |            | 0.24 <sup>c</sup> |      |            |        |      |            | 0.50 <sup>c</sup> |      |            |        |
| oral estrogen & progesterone (yrs) |    |   |      |            |                   |      |            |        |      |            |                   |      |            |        |
| Current user                       | 10 | + | 2.09 | 1.78, 2.46 | <0.001            | 2.46 | 2.04, 2.97 | <0.001 | 2.05 | 1.26, 3.34 | 0.004             | 1.41 | 1.07, 1.86 | 0.015  |
|                                    |    | - | 2.18 | 1.43, 3.31 | <0.001            | 1.59 | 1.19, 2.12 | 0.002  | 1.73 | 1.37, 2.18 | <0.001            | 2.50 | 2.14, 2.92 | <0.001 |
|                                    |    |   |      |            | 0.88 <sup>c</sup> |      |            |        |      |            | 0.54 <sup>c</sup> |      |            |        |
| Past user                          | 10 | + | 1.35 | 1.12, 1.64 | 0.002             | 1.48 | 1.19, 1.85 | <0.001 | 1.80 | 1.04, 3.12 | 0.036             | 0.96 | 0.70, 1.33 | 0.83   |
|                                    |    | - | 1.32 | 0.81, 2.16 | 0.26              | 1.14 | 0.82, 1.58 | 0.45   | 1.99 | 1.53, 2.58 | <0.001            | 1.55 | 1.29, 1.87 | <0.001 |
|                                    |    |   |      |            | 0.93 <sup>c</sup> |      |            |        |      |            | 0.75 <sup>c</sup> |      |            |        |
| other types of hormones (yrs)      |    |   |      |            |                   |      |            |        |      |            |                   |      |            |        |
| Current user                       | 10 | + | 1.56 | 1.32, 1.85 | <0.001            | 1.76 | 1.45, 2.14 | <0.001 | 1.45 | 0.87, 2.43 | 0.15              | 1.29 | 0.99, 1.69 | 0.062  |
|                                    |    | - | 1.65 | 1.09, 2.52 | 0.019             | 1.30 | 0.96, 1.75 | 0.087  | 1.26 | 0.99, 1.60 | 0.066             | 1.72 | 1.45, 2.03 | <0.001 |
|                                    |    |   |      |            | 0.82 <sup>c</sup> |      |            |        |      |            | 0.61 <sup>c</sup> |      |            |        |
| Past user                          | 10 | + | 1.01 | 0.83, 1.23 | 0.92              | 1.06 | 0.84, 1.33 | 0.64   | 1.28 | 0.72, 2.27 | 0.40              | 0.88 | 0.65, 1.21 | 0.44   |
|                                    |    | - | 1.00 | 0.62, 1.63 | 0.98              | 0.93 | 0.66, 1.30 | 0.66   | 1.45 | 1.11, 1.89 | 0.007             | 1.07 | 0.88, 1.29 | 0.52   |
|                                    |    |   |      |            | 0.99 <sup>c</sup> |      |            |        |      |            | 0.57 <sup>c</sup> |      |            |        |
|                                    |    |   |      |            |                   |      |            |        |      |            | 0.70 <sup>c</sup> |      |            |        |
|                                    |    |   |      |            |                   |      |            |        |      |            |                   |      |            |        |

|                                       |    |   |      |            |                   |      |            |        |      |            |                   |      |            |        |
|---------------------------------------|----|---|------|------------|-------------------|------|------------|--------|------|------------|-------------------|------|------------|--------|
| Body mass index                       |    |   |      |            |                   |      |            |        |      |            |                   |      |            |        |
| (BMI) (kg/m <sup>2</sup> )            |    |   |      |            |                   |      |            |        |      |            |                   |      |            |        |
| Age 50                                | 8  | + | 0.75 | 0.66, 0.85 | <0.001            | 0.90 | 0.78, 1.04 | 0.15   | 0.92 | 0.62, 1.36 | 0.67              | 0.82 | 0.68, 0.99 | 0.039  |
|                                       |    | - | 0.98 | 0.72, 1.35 | 0.91              | 0.63 | 0.50, 0.79 | <0.001 | 0.78 | 0.66, 0.93 | 0.005             | 0.78 | 0.69, 0.88 | <0.001 |
|                                       |    |   |      |            | 0.16 <sup>c</sup> |      |            |        |      |            | 0.47 <sup>c</sup> |      |            |        |
| Age 70                                | 8  | + | 1.20 | 1.04, 1.37 | 0.010             | 1.52 | 1.30, 1.78 | <0.001 | 1.38 | 0.92, 2.09 | 0.12              | 1.33 | 0.98, 1.82 | 0.069  |
|                                       |    | - | 1.20 | 0.83, 1.73 | 0.33              | 0.77 | 0.60, 0.99 | 0.043  | 1.14 | 0.94, 1.38 | 0.19              | 0.94 | 0.71, 1.26 | 0.69   |
|                                       |    |   |      |            | 0.99 <sup>c</sup> |      |            |        |      |            | 0.40 <sup>c</sup> |      |            |        |
| Height (in.)                          |    |   |      |            |                   |      |            |        |      |            |                   |      |            |        |
| Age 50                                | 6  | + | 1.17 | 1.04, 1.32 | 0.010             | 1.29 | 1.12, 1.48 | <0.001 | 0.89 | 0.60, 1.32 | 0.57              | 1.13 | 0.94, 1.36 | 0.20   |
|                                       |    | - | 1.20 | 0.89, 1.62 | 0.22              | 1.00 | 0.81, 1.23 | 0.99   | 1.19 | 1.01, 1.41 | 0.038             | 1.20 | 1.06, 1.35 | 0.003  |
|                                       |    |   |      |            | 0.87 <sup>c</sup> |      |            |        |      |            | 0.18 <sup>c</sup> |      |            |        |
| Age 70                                | 6  | + | 1.09 | 0.90, 1.31 | 0.40              | 1.33 | 1.06, 1.67 | 0.015  | 1.65 | 0.92, 2.94 | 0.092             | 1.09 | 0.80, 1.48 | 0.58   |
|                                       |    | - | 1.70 | 1.05, 2.75 | 0.030             | 0.96 | 0.69, 1.32 | 0.78   | 1.12 | 0.85, 1.49 | 0.42              | 1.22 | 1.01, 1.49 | 0.041  |
|                                       |    |   |      |            | 0.11 <sup>c</sup> |      |            |        |      |            | 0.24 <sup>c</sup> |      |            |        |
| Alcohol (gm)                          |    |   |      |            |                   |      |            |        |      |            |                   |      |            |        |
| Age 50                                | 11 | + | 1.20 | 1.11, 1.30 | <0.001            | 1.18 | 1.07, 1.29 | <0.001 | 1.30 | 1.03, 1.64 | 0.027             | 1.18 | 1.04, 1.34 | 0.009  |
|                                       |    | - | 1.15 | 0.94, 1.41 | 0.16              | 1.22 | 1.07, 1.39 | 0.003  | 1.09 | 0.97, 1.23 | 0.15              | 1.20 | 1.11, 1.30 | <0.001 |
|                                       |    |   |      |            | 0.72 <sup>c</sup> |      |            |        |      |            | 0.19 <sup>c</sup> |      |            |        |
| Age 70                                | 11 | + | 1.26 | 1.15, 1.39 | <0.001            | 1.23 | 1.05, 1.44 | 0.012  | 1.24 | 0.92, 1.66 | 0.16              | 1.19 | 1.00, 1.43 | 0.055  |
|                                       |    | - | 1.14 | 0.89, 1.46 | 0.31              | 1.21 | 1.04, 1.42 | 0.016  | 1.19 | 1.04, 1.37 | 0.15              | 1.26 | 1.09, 1.46 | 0.002  |
|                                       |    |   |      |            | 0.46 <sup>c</sup> |      |            |        |      |            | 0.84 <sup>c</sup> |      |            |        |
| Family history<br>of breast<br>cancer |    | + | 1.56 | 1.40, 1.73 | <0.001            | 1.48 | 1.30, 1.68 | <0.001 | 1.76 | 1.25, 2.47 | 0.001             | 1.22 | 1.02, 1.47 | 0.031  |
|                                       |    | - | 1.40 | 1.07, 1.83 | 0.015             | 1.61 | 1.34, 1.93 | <0.001 | 1.51 | 1.30, 1.76 | <0.001            | 1.67 | 1.50, 1.86 | <0.001 |
|                                       |    |   |      |            | 0.50 <sup>c</sup> |      |            |        |      |            | 0.43 <sup>c</sup> |      |            |        |

BBD, benign breast disease; BMI, body mass index; ER, estrogen receptor; HER2, Human Epidermal growth factor Receptor 2; HT, hormone therapy; PR, progesterone receptor.

<sup>a</sup> Tumor size: small if ≤2cm; large if >2cm.

<sup>b</sup> Increment: duration of premenopause, duration of menopause, 1 yr; gynecologic age at 1<sup>st</sup> birth, 22 (35-13) yrs vs. nulliparous; birth index, 102 (4 births at ages 20, 23, 26, 29) vs. nulliparous; benign breast disease, family history, present vs. absent; hormone therapy, 10 yrs of use vs. 0 yrs of use; body mass index, 8 kg/m<sup>2</sup> (30 kg/m<sup>2</sup> vs. 22 kg/m<sup>2</sup>); height 6 in. (5'10" vs. 5'4"); alcohol (11 gm, 1 drink per day vs. 0 drinks per day starting at age 18). All comparisons assume age at menarche = 13 and age at natural menopause = 50; HR for Body mass index, height and alcohol assume no HT use

<sup>c</sup> P-value for heterogeneity comparing subtype + vs. subtype -

<sup>d</sup> age at 1<sup>st</sup> birth – age at menarche
